# Supplementary material for: Trimethylation of Elongation Factor-Tu by the Dual Thermoregulated Methyltransferase EftM Does Not Impact Its Canonical Function in Translation
Source: PubMed Central journal article supplement (PMC6401129; doi:10.1038/s41598-019-39331-x), 2019-03-05
Supplement: 41598_2019_39331_MOESM2_ESM.pdf [file 41598_2019_39331_MOESM2_ESM.pdf]

## Trimethylation of Elongation Factor-Tu by the Dual Thermoregulated Methyltransferase EftM Does Not Impact Its Canonical Function in Translation

Samantha M. Prezioso<sup>1,2</sup>, Duc M. Duong<sup>3</sup>, Emily G. Kuiper<sup>4,5</sup>, Qiudong Deng<sup>3</sup>, Sebastián Albertí<sup>6</sup>, Graeme L. Conn<sup>5,7</sup>, Joanna B. Goldberg<sup>2,7,8\*</sup>

\*Correspondence and requests for materials should be addressed to JBG (email: joanna.goldberg@emory.edu)

### **Affiliations**

<sup>1</sup>Microbiology and Molecular Genetics (MMG) Program, Graduate Division of Biological and Biomedical Sciences, Emory University, Atlanta, GA 30322, USA.

<sup>2</sup>Division of Pulmonology, Allergy/Immunology, Cystic Fibrosis and Sleep, Department of Pediatrics, Emory University School of Medicine, Atlanta, GA 30322, USA.

<sup>3</sup>Emory Integrated Proteomics Core, Emory University, Atlanta GA 30322

<sup>4</sup>Biochemistry, Cell and Developmental Biology (BCDB) Program, Graduate Division of Biological and Biomedical Sciences, Emory University, Atlanta, GA 30322, USA.

<sup>5</sup>Department of Biochemistry, Emory University School of Medicine, Atlanta, GA 30322, USA.

<sup>6</sup>Instituto Universitario de Investigación en Ciencias de la Salud, Universidad de las Islas Baleares, Palma de Mallorca, Spain.

<sup>7</sup>Emory Antibiotic Resistance Center, Atlanta, GA 30322, USA.

<sup>8</sup>Emory+Children's Center for Cystic Fibrosis and Airway Disease Research, Atlanta, GA 30322, USA.

## Supplemental Table 2

| Significant Proteins from PA14 |   |                        |                    |                          | Corresponding Values from PAO1 Data Set 1 |                        |                    |                          | Corresponding Values from PAO1 Data Set 2 |                        |                    |                          | Corresponding Values from PAHM4 |                        |                    |                          |                      |
|--------------------------------|---|------------------------|--------------------|--------------------------|-------------------------------------------|------------------------|--------------------|--------------------------|-------------------------------------------|------------------------|--------------------|--------------------------|---------------------------------|------------------------|--------------------|--------------------------|----------------------|
|                                |   | Fold change<br>WT vs Δ | p-value<br>WT vs Δ | Fold change<br>Comp vs Δ | p-value<br>Comp vs Δ                      | Fold change<br>WT vs Δ | p-value<br>WT vs Δ | Fold change<br>Comp vs Δ | p-value<br>Comp vs Δ                      | Fold change<br>WT vs Δ | p-value<br>WT vs Δ | Fold change<br>Comp vs Δ | p-value<br>Comp vs Δ            | Fold change<br>WT vs Δ | p-value<br>WT vs Δ | Fold change<br>Comp vs Δ | p-value<br>Comp vs Δ |
| <b>PA14_24370</b>              | * | 1.3E+07                | 4.2E-10            | 1.1E+07                  | 3.1E-11                                   | N.D.                   | N/A                | N.D.                     | N/A                                       | -1.298                 | 0.367              | -1.094                   | 0.870                           | -1.212                 | 0.345              | -1.288                   | 0.190                |
| <b>PA14_64050</b>              | # | -1.3E+05               | 0.003              | -1.283                   | 0.019                                     | 1.066                  | 0.985              | 1.037                    | 0.991                                     | -1.680                 | 0.056              | -1.467                   | 0.151                           | N.D.                   | N/A                | N.D.                     | N/A                  |

## Supplemental Table 3

| Significant Proteins from PAHM4 |          |                        |                    |                          | Corresponding Values from PAO1 Data Set 1 |                        |                    |                          | Corresponding Values from PAO1 Data Set 2 |                        |                    |                          | Corresponding Values from PA14 |                        |                    |                          |                      |
|---------------------------------|----------|------------------------|--------------------|--------------------------|-------------------------------------------|------------------------|--------------------|--------------------------|-------------------------------------------|------------------------|--------------------|--------------------------|--------------------------------|------------------------|--------------------|--------------------------|----------------------|
|                                 |          | Fold change<br>WT vs Δ | p-value<br>WT vs Δ | Fold change<br>Comp vs Δ | p-value<br>Comp vs Δ                      | Fold change<br>WT vs Δ | p-value<br>WT vs Δ | Fold change<br>Comp vs Δ | p-value<br>Comp vs Δ                      | Fold change<br>WT vs Δ | p-value<br>WT vs Δ | Fold change<br>Comp vs Δ | p-value<br>Comp vs Δ           | Fold change<br>WT vs Δ | p-value<br>WT vs Δ | Fold change<br>Comp vs Δ | p-value<br>Comp vs Δ |
| <b>PAHM4_RS15825</b>            | N/A      | -1.647                 | 0.015              | -1.668                   | 0.014                                     | N/A                    | N/A                | N/A                      | N/A                                       | N/A                    | N/A                | N/A                      | N/A                            | N/A                    | N/A                | N/A                      | N/A                  |
| <b>PAHM4_RS08095</b>            | (PA5074) | -1.480                 | 2.914E-04          | -1.153                   | 0.044                                     | 1.967                  | 0.083              | 1.588                    | 0.241                                     | -1.164                 | 0.343              | -1.083                   | 0.713                          | 1.088                  | 0.919              | -1.072                   | 0.949                |
| <b>PAHM4_RS12930</b>            | (PA3712) | 1.457                  | 0.012              | 1.476                    | 0.010                                     | 1.179                  | 0.642              | 1.066                    | 0.932                                     | -1.255                 | 0.091              | -1.085                   | 0.645                          | 1.242                  | 0.497              | -1.139                   | 0.758                |
| <b>PAHM4_RS25435</b>            | (PA3106) | -1.394                 | 0.030              | -1.363                   | 0.039                                     | -1.191                 | 0.705              | -1.025                   | 0.993                                     | -1.106                 | 0.430              | 1.077                    | 0.609                          | -1.057                 | 0.928              | 1.129                    | 0.716                |
| <b>PAHM4_RS17805</b>            | (PA2912) | -1.348                 | 4.795E-06          | -1.085                   | 0.007                                     | N.D.                   | N/A                | N.D.                     | N/A                                       | N.D.                   | N/A                | N.D.                     | N/A                            | N.D.                   | N/A                | N.D.                     | N/A                  |
| <b>PAHM4_RS18780</b>            | (PA1117) | -1.330                 | 0.020              | -1.336                   | 0.018                                     | 1.344                  | 0.640              | 1.651                    | 0.395                                     | -1.031                 | 0.980              | 1.094                    | 0.841                          | # -319.367             | 0.837              | 1.013                    | 0.999                |
| <b>PAHM4_RS16925</b>            | (PA0354) | -1.242                 | 0.001              | -1.133                   | 0.015                                     | 1.053                  | 0.872              | -1.250                   | 0.152                                     | 1.000                  | 1.000              | 1.010                    | 0.979                          | -1.076                 | 0.832              | 1.014                    | 0.993                |
| <b>PAHM4_RS10405</b>            | (PA1880) | -1.235                 | 0.021              | -1.287                   | 0.009                                     | N.D.                   | N/A                | N.D.                     | N/A                                       | -1.070                 | 0.926              | -1.189                   | 0.770                          | 1.091                  | 0.868              | -1.097                   | 0.851                |
| <b>PAHM4_RS00050</b>            | (PA0225) | -1.138                 | 0.042              | -1.137                   | 0.044                                     | N.D.                   | N/A                | N.D.                     | N/A                                       | -1.347                 | 0.480              | 1.139                    | 0.856                          | N.D.                   | N/A                | N.D.                     | N/A                  |
| <b>PAHM4_RS05090</b>            | (PA4329) | 1.098                  | 0.001              | 1.052                    | 0.024                                     | 1.045                  | 0.781              | 1.089                    | 0.437                                     | 1.046                  | 0.658              | -1.058                   | 0.535                          | 1.142                  | 0.461              | -1.046                   | 0.902                |

**Supplemental Table 2: Whole-cell proteomic analysis reveals that trimethylation of EF-Tu by EftM has little impact on the proteome.**

Proteins from PA14 significantly changing in  $\Delta$  (PA14 *eftM*::tn) compared to WT (PA14) and Comp (PA14 *eftM*::tn *attTn7*::P<sub>*eftM*</sub>-*eftM*-FLAG). The corresponding values from PAO1 and PAHM4 are listed to the right for comparison.

Bold; proteins detected in one data set only. Positive fold change; abundance is higher in strain with EftM. Negative fold change; abundance is higher in strain without EftM. ★ denotes that the protein was not detected in all three biological triplicates of  $\Delta$ ; ‡ denotes not detected in biological triplicates of WT. N.D; not detected in all three biological triplicates of all three strains (WT,  $\Delta$ , Comp) for that data set. N/A; not applicable.

**Supplemental Table 3: Whole-cell proteomic analysis reveals that trimethylation of EF-Tu by EftM has little impact on the proteome.**

Proteins from PAHM4 significantly changing in  $\Delta$  (PAHM4 $\Delta$ *eftM*) compared to WT (PAHM4) and Comp (PAHM4 $\Delta$ *eftM* *attTn7*::P<sub>*eftM-HM4*</sub>-*eftM*<sub>*HM4*</sub>-FLAG). The corresponding values from PAO1 and PA14 are listed to the right for comparison.

Bold; proteins detected in one data set only. Positive fold change; abundance is higher in strain with EftM. Negative fold change; abundance is higher in strain without EftM. ★ denotes that the protein was not detected in all three biological triplicates of  $\Delta$ ; ‡ denotes not detected in biological triplicates of WT. N.D; not detected in all three biological triplicates of all three strains (WT,  $\Delta$ , Comp) for that data set. N/A; not applicable.

**Supplemental Table 4. Strain List**

| ID                         | Genotype                                                                                                     | Reference                         |
|----------------------------|--------------------------------------------------------------------------------------------------------------|-----------------------------------|
| PAO1                       | <i>P. aeruginosa</i> PAO1                                                                                    | Barbier, Owings <i>et al</i> 2013 |
| PAO1 $\Delta$ <i>eftM</i>  | PAO1 <i>eftM</i> $\Delta$ 255-487                                                                            | Barbier, Owings <i>et al</i> 2013 |
| PASP09                     | PAO1 $\Delta$ <i>eftM</i> <i>attTn7</i> ::P <sub><i>eftM</i></sub> - <i>eftM</i> <sub>PAO1</sub> -FLAG       | This Study                        |
| PASP106                    | PAO1 $\Delta$ <i>eftM</i> <i>attTn7</i> ::P <sub><i>eftM-10SCR</i></sub> - <i>eftM</i> <sub>PAO1</sub> -FLAG | This Study                        |
| PASP20                     | PAO1 $\Delta$ <i>eftM</i> <i>attTn7</i> ::P <sub><i>eftM</i></sub> - <i>eftM</i> <sub>HM4</sub> -FLAG        | This Study                        |
| PASP76                     | PAO1 <i>attCTX</i> ::P <sub><i>eftM</i></sub> - <i>lacZ</i> <i>FRT</i>                                       | This Study                        |
| PASP65                     | PAO1 <i>attCTX</i> ::P <sub><i>rpoD</i></sub> - <i>lacZ</i> <i>FRT</i>                                       | This Study                        |
| PA14                       | <i>P. aeruginosa</i> PA14                                                                                    | Rahme, Stevens <i>et al.</i> 1995 |
| PA14 <i>eftM</i> ::tn      | PA14_08970::MAR2xT7                                                                                          | Liberati <i>et al.</i> 2006       |
| PASP12                     | PA14 <i>eftM</i> ::tn <i>attTn7</i> ::P <sub><i>eftM</i></sub> - <i>eftM</i> <sub>PAO1</sub> -FLAG           | This Study                        |
| PAHM4                      | <i>P. aeruginosa</i> PAHM4                                                                                   | Varga <i>et al.</i> 2015          |
| PAHM4 $\Delta$ <i>eftM</i> | PAHM4 <i>eftM</i> $\Delta$ 255-487                                                                           | This Study                        |
| PASP51                     | PAHM4 $\Delta$ <i>eftM</i> <i>attTn7</i> ::P <sub><i>eftM</i></sub> - <i>eftM</i> <sub>HM4</sub> -FLAG       | This Study                        |

**Supplemental Table 5. Oligonucleotides**

| ID            | Target                                                                                     | Sequence                                                          |
|---------------|--------------------------------------------------------------------------------------------|-------------------------------------------------------------------|
| SMP10         | complementation of <i>eftM</i> (PAO1)                                                      | TGG ATC CCC AGA CCT TCC ACG GCA GTT G                             |
| SMP45         | complementation of <i>eftM</i> (PAO1) with FLAG tag                                        | TGA ATT CCT ACT TGT CAT CGT CAT CCT TGT AGT CGC GCT TCA CGC AGA C |
| SMP216        | creation of scrambled -10 promoter                                                         | AAG GCC CGG GCC TGG GGA TTA CCG CCG CGC CCT TCG CCG CCG GTC C     |
| SMP217        | creation of scrambled -10 promoter                                                         | CAG GTG CTG CAG CTC GGC GAA                                       |
| SMP17         | complementation of <i>eftM</i> (PAHM4)                                                     | TGG ATC CAA CCA GAT CCT CCA CGG CAG TTG                           |
| SMP47         | complementation of <i>eftM</i> (PAHM4) with FLAG tag                                       | TGA ATT CCT ACT TGT CAT CGT CAT CCT TGT AGT CGC GCT TGA TGC AGG C |
| SMP189        | P <sub><i>eftM</i></sub> - <i>lacZ</i> reporter                                            | TGG ATC CCC CGG GCT GCA GGA GTC CGC CCG CGA TCC GCC GGC CGG T     |
| SMP196        | P <sub><i>eftM</i></sub> - <i>lacZ</i> reporter                                            | TCA TGG TCA TGG GCG GCA AGG ACC GGC GGC GAA GGG CGC               |
| SMP184        | P <sub><i>eftM</i></sub> - <i>lacZ</i> reporter                                            | TCC TTG CCG CCC ATG ACC ATG ATT ACG GAT TC                        |
| SMP179        | P <sub><i>eftM</i></sub> - <i>lacZ</i> and P <sub><i>rpoD</i></sub> - <i>lacZ</i> reporter | CGA GGT CGA CGG TAT CGA TAA GCT TTA TTT TTG ACA CCA GAC C         |
| SMP176        | P <sub><i>rpoD</i></sub> - <i>lacZ</i> reporter                                            | TGG ATC CCC CGG GCT GCA GGC CTT GAA AAG CAG TTC TTC GAC           |
| SMP177        | P <sub><i>rpoD</i></sub> - <i>lacZ</i> reporter                                            | TCA TGG TCA TAA CAC CCT ATC CAC TGA AGG T                         |
| SMP178        | P <sub><i>rpoD</i></sub> - <i>lacZ</i> reporter                                            | GGA TAG GGT GTT ATG ACC ATG ATT ACG GAT TC                        |
| SMP155        | <i>eftM</i> qPCR                                                                           | GAC ATC AAC CAG CCG ATG CTC                                       |
| SMP156        | <i>eftM</i> qPCR                                                                           | CAG CCC TGC GTT GTA GTG GA                                        |
| <i>rpoD</i> F | <i>rpoD</i> qPCR                                                                           | GGG CGA AGA AGG AAA TGG TC                                        |
| <i>rpoD</i> R | <i>rpoD</i> qPCR                                                                           | CAG GTG GCG TAG GTG GAG AA                                        |
| oJV1040       | <i>omlA</i> qPCR                                                                           | AAA ATC GAC ATC CAG CAA GG                                        |
| oJV1041       | <i>omlA</i> qPCR                                                                           | GGT CGC TGT CGT TGA AGA AC                                        |
| SMP22         | <i>eftM</i> 5' RACE GSP1                                                                   | TGC GTT GTA GTG GAT CGA ATA G                                     |
| SMP49         | <i>eftM</i> 5' RACE GSP2                                                                   | GAG CAT CGG CTG GTT GAT GTC                                       |
